# Supplementary material
Source: Springer Nature journal article supplement (https://www.springermedizin.de/resource/supplementary/12990_2011_392_MOESM5_ESM.pdf/9613168)

Urothelium and suburothelial layer

Muscular layer

CB<sub>1</sub> Antibody

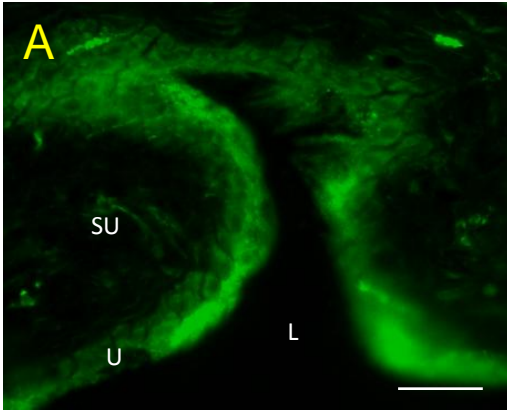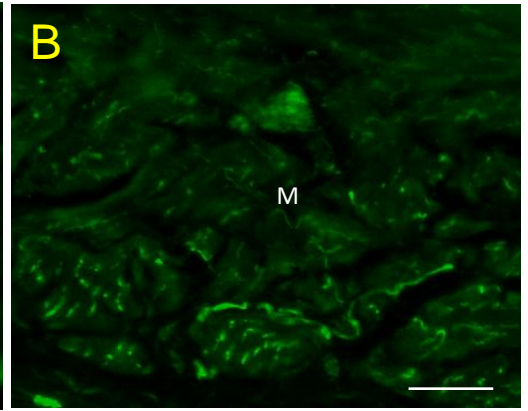

CB<sub>1</sub> Antibody  
+ blocking peptide

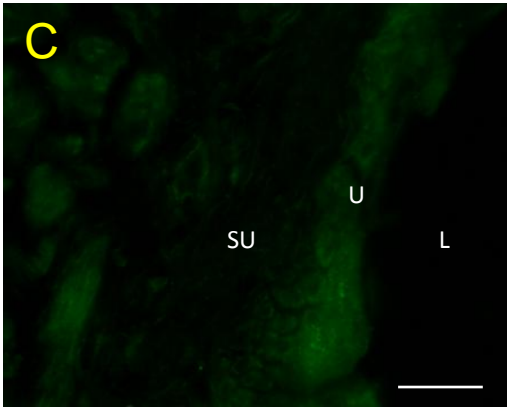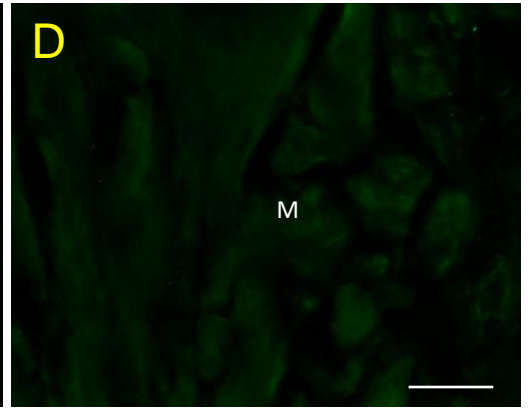

TRPV1 Antibody

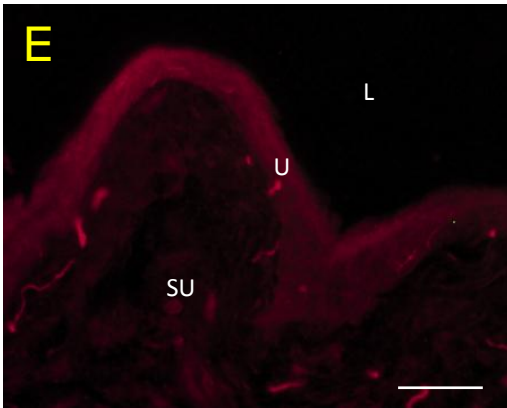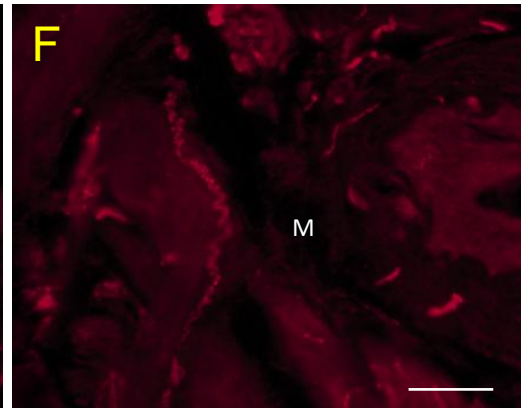

TRPV1 Antibody  
+ blocking peptide

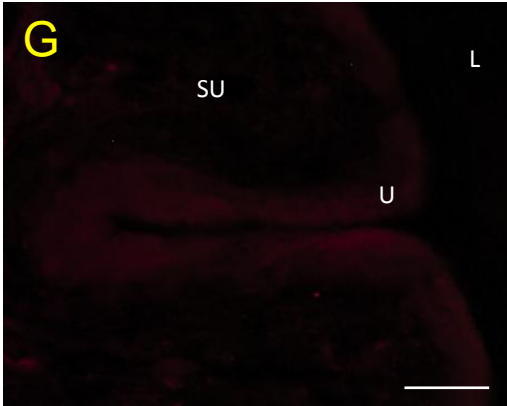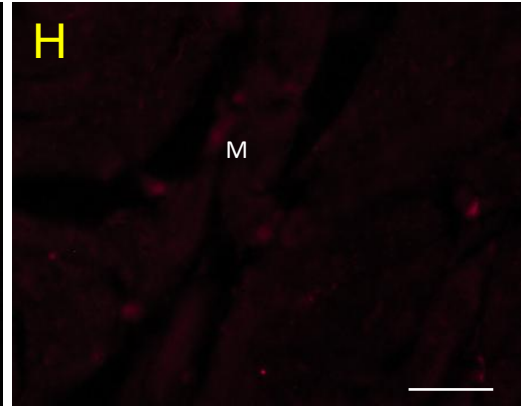

Supplement: MOESM5 [file 9613168]
